# Supplementary material for: Asymptomatic and Mild SARS-CoV-2 Infections in a Hungarian Outpatient Cohort in the First Year of the COVID-19 Pandemic
Source: MDPI journal article supplement (doi:10.3390/tropicalmed8040204), 2023-03-29
Supplement: s1 [file s1]

Table S1. Results of the samples obtained at the first visit and days (in brackets) after the first visit.

| Participant<br>identification<br>number | Age<br>(Years) | Sex | Test | Date of first<br>visit | Visit |                   |                    |             |
|-----------------------------------------|----------------|-----|------|------------------------|-------|-------------------|--------------------|-------------|
|                                         |                |     |      |                        | 1     | 2                 | 3                  | 4           |
| <b>1*</b>                               | 37             | F   | PCR  | 10.15.20               | +     | -                 | -                  | nd          |
|                                         |                |     | IgG  |                        | -     | (53d)<br>+(0.695) | (63d)<br>nd        | nd          |
| <b>2*</b>                               | 25             | F   | PCR  | 10.28.20               | +     | -                 | -                  | nd          |
|                                         |                |     | IgG  |                        | -     | (12d)<br>-        | (102d)<br>+(1.093) |             |
| <b>3</b>                                | 42             | F   | PCR  | 10.30.20               | +     | +                 | -                  | nd          |
|                                         |                |     | IgG  |                        | -     | (6d)<br>-         | (35d)<br>-         | (129d)<br>- |
| <b>4</b>                                | 44             | M   | PCR  | 11.02.20               | +     | -                 | -                  | nd          |
|                                         |                |     | IgG  |                        | -     | (18d)<br>-        | (21d)<br>-         | nd          |
| <b>5</b>                                | 51             | M   | PCR  | 11.02.20               | +     | +                 | +                  | -           |
|                                         |                |     | IgG  |                        | -     | (4d)<br>-         | (17d)<br>-         | (80d)<br>-  |
| <b>6</b>                                | 57             | M   | PCR  | 11.06.20               | +     | +                 | -                  | nd          |
|                                         |                |     | IgG  |                        | -     | (6 d)<br>-        | (42d)<br>-         | nd          |
| <b>7</b>                                | 32             | F   | PCR  | 11.11.20               | +     | -                 | +                  | nd          |
|                                         |                |     | IgG  |                        | -     | (60d)<br>-        | (105d)<br>-        | nd          |
| <b>8</b>                                | 26             | M   | PCR  | 11.11.20               | +     | +                 | +                  | -           |
|                                         |                |     | IgG  |                        | -     | (5d)<br>-         | (14d)<br>-         | (62d)<br>-  |
| <b>9*</b>                               | 53             | M   | PCR  | 11.11.20               | +     | -                 | -                  | nd          |
|                                         |                |     | IgG  |                        | -     | (15d)<br>-        | (30d)<br>-         | nd          |
| <b>10*</b>                              | 53             | F   | PCR  | 11.13.20               | +     | +                 | -                  | -           |
|                                         |                |     | IgG  |                        | -     | (17)<br>-         | (24)<br>-          | (27)<br>-   |
| <b>11</b>                               | 45             | F   | PCR  | 11.18.20               | +     | -                 | -                  | nd          |
|                                         |                |     | IgG  |                        | -     | (12d)<br>-        | (30d)<br>+(0.608)  | nd          |
| <b>12</b>                               | 27             | F   | PCR  | 11.18.20               | -     | -                 | +                  | nd          |
|                                         |                |     | IgG  |                        | -     | (8d)<br>-         | (47d)<br>-         | nd          |
| <b>13*</b>                              | 33             | F   | PCR  | 11.18.20               | +     | +                 | +                  | nd          |

| Participant<br>identification<br>number | Age<br>(Years) | Sex | Test | Date of first<br>visit | (15d) (30d) |       |         |          |
|-----------------------------------------|----------------|-----|------|------------------------|-------------|-------|---------|----------|
|                                         |                |     |      |                        | IgG         |       |         |          |
|                                         |                |     |      |                        | 1           | 2     | 3       | 4        |
| 14                                      | 27             | M   | PCR  | 11.19.20               | -           | +     | +       | -        |
|                                         |                |     |      |                        |             | (12d) | (25d)   | (32d)    |
|                                         |                |     | IgG  |                        | -           | -     | -       | -        |
| 15                                      | 34             | F   | PCR  | 11.20.20               | +           | -     | -       | nd       |
|                                         |                |     |      |                        |             | (6d)  | (79d)   |          |
|                                         |                |     | IgG  |                        | -           | -     | -       | nd       |
| 16*                                     | 49             | F   | PCR  | 11.24.20               | +           | +     | +       | -        |
|                                         |                |     |      |                        |             | (14d) | (21d)   | (26d)    |
|                                         |                |     | IgG  |                        | -           | -     | -       | -        |
| 17                                      | 32             | M   | PCR  | 11.25.20               | -           | +     | +       | nd       |
|                                         |                |     |      |                        |             | (7d)  | (27d)   |          |
|                                         |                |     | IgG  |                        | -           | -     | -       | nd       |
| 18                                      | 42             | F   | PCR  | 11.26.20               | +           | -     | +       | nd       |
|                                         |                |     |      |                        |             | (12d) | (15d)   | nd       |
|                                         |                |     | IgG  |                        | -           | -     | -       | nd       |
| 19*                                     | 45             | M   | PCR  | 11.30.20               | +           | nd    | +       | nd       |
|                                         |                |     |      |                        |             | (10d) | (24d)   |          |
|                                         |                |     | IgG  |                        | -           | -     | -       | nd       |
| 20                                      | 20             | M   | PCR  | 12.01.20               | +           | +     | -       | nd       |
|                                         |                |     |      |                        |             | (14d) | (21d)   |          |
|                                         |                |     | IgG  |                        | -           | -     | -       | nd       |
| 21                                      | 27             | M   | PCR  | 12.01.20               | +           | +     | +       | nd       |
|                                         |                |     |      |                        |             | (9d)  | (14d)   |          |
|                                         |                |     | IgG  |                        | -           | -     | -       | nd       |
| 22                                      | 32             | M   | PCR  | 12.03.20               | +           | +     | -       | nd       |
|                                         |                |     |      |                        |             | (12d) | (19d)   |          |
|                                         |                |     | IgG  |                        | -           | -     | -       | nd       |
| 23                                      | 43             | F   | PCR  | 12.04.20               | +           | -     | +       | -        |
|                                         |                |     |      |                        |             | (14d) | (19d)   | (25d)    |
|                                         |                |     | IgG  |                        | -           | -     | -       | +(0.339) |
| 24                                      | 43             | M   | PCR  | 12.04.20               | +           | +     | -       | nd       |
|                                         |                |     |      |                        |             | (10d) | (18d)   |          |
|                                         |                |     | IgG  |                        | -           | -     | -       | nd       |
| 25                                      | 34             | M   | PCR  | 12.07.20               | +           | +     | -       | nd       |
|                                         |                |     |      |                        |             | (14d) | (21d)   |          |
|                                         |                |     | IgG  |                        | -           | -     | -       | nd       |
| 26                                      | 27             | F   | PCR  | 12.21.20               | -           | +     | -       | nd       |
|                                         |                |     |      |                        |             | (16d) | (46d)   |          |
|                                         |                |     | IgG  |                        | +(0.415)    | -     | +(0.91) | nd       |
| 27*                                     | 55             | M   | PCR  | 01.25.21               | -           | -     | -       | +        |

| Participant<br>Identification<br>number | Age<br>(Years) | Sex | Test | Date of first<br>visit | Visit |       |       |          |
|-----------------------------------------|----------------|-----|------|------------------------|-------|-------|-------|----------|
|                                         |                |     |      |                        |       |       |       |          |
|                                         |                |     |      |                        | 1     | 2     | 3     | 4        |
| 28                                      | 58             | F   | PCR  | 01.25.21               | -     | -     | +     | nd       |
|                                         |                |     | IgG  |                        | -     | (2d)  | (23d) | nd       |
| 39*                                     | 46             | M   | PCR  | 01.27.21               | -     | -     | +     | +        |
|                                         |                |     | IgG  |                        | -     | (6d)  | (19d) | (30d)    |
| 30                                      | 52             | F   | PCR  | 02.11.21               | +     | +     | +     | nd       |
|                                         |                |     | IgG  |                        | -     | (4d)  | (14d) | nd       |
| 31                                      | 68             | F   | PCR  | 02.15.21               | +     | -     | -     | nd       |
|                                         |                |     | IgG  |                        | -     | (10d) | (17d) | nd       |
| 32                                      | 50             | F   | PCR  | 02.15.21               | -     | -     | +     | nd       |
|                                         |                |     | IgG  |                        | -     | (11d) | (15d) | nd       |
| 33*                                     | 45             | F   | PCR  | 02.16.21               | +     | +     | -     | -        |
|                                         |                |     | IgG  |                        | -     | (3d)  | (10d) | (15d)    |
|                                         |                |     |      |                        | -     | -     | -     | +(1.640) |

\* Participants with symptoms  
nd=not done
